# Supplementary material
Source: ML conference proceedings conference paper supplement (https://proceedings.neurips.cc/paper_files/paper/2017/hash/f5f8590cd58a54e94377e6ae2eded4d9-Abstract.html)
Supplement: Supplementary file [file f5f8590cd58a54e94377e6ae2eded4d9-Supplemental.zip]

---

# Avoiding Discrimination through Causal Reasoning

---

**Niki Kilbertus<sup>†‡</sup>**  
nkilbertus@tue.mpg.de

**Mateo Rojas-Carulla<sup>†‡</sup>**  
mrojas@tue.mpg.de

**Giambattista Parascandolo<sup>†§</sup>**  
gparascandolo@tue.mpg.de

**Moritz Hardt<sup>\*</sup>**  
hardt@berkeley.edu

**Dominik Janzing<sup>†</sup>**  
janzing@tue.mpg.de

**Bernhard Schölkopf<sup>†</sup>**  
bs@tue.mpg.de

<sup>†</sup>Max Planck Institute for Intelligent Systems

<sup>‡</sup>University of Cambridge

<sup>§</sup>Max Planck ETH Center for Learning Systems

<sup>\*</sup>University of California, Berkeley

## Supplementary material

### Proof of Theorem 1

**Theorem.** *Given a joint distribution over the protected attribute  $A$ , the true label  $Y$ , and some features  $X_1, \dots, X_n$ , in which we have already specified the resolving variables, no observational criterion can generally determine whether the Bayes optimal unconstrained predictor or the Bayes optimal equal odds predictor exhibit unresolved discrimination.*

*Proof.* Let us consider the two graphs in Figure 2. First, we show that these graphs can generate the same joint distribution  $\mathbb{P}(A, Y, X_1, X_2, R^*)$  for the Bayes optimal unconstrained predictor  $R^*$ .

We choose the following structural equations for the graph on the left<sup>1</sup>

- $A = \text{Ber}(1/2)$
- $X_1$  is a mixture of Gaussians  $\mathcal{N}(A + 1, 1)$  with weight  $\sigma(2A)$  and  $\mathcal{N}(A - 1, 1)$  with weight  $\sigma(-2A)$
- $Y = \text{Ber}(\sigma(2X_1))$
- $X_2 = X_1 - A$
- $R^* = X_1$
- $(\tilde{R} = X_2)$

where the Bernoulli distribution  $\text{Ber}(p)$  without a superscript has support  $\{-1, 1\}$ .

For the graph on the right, we define the structural equations

- $A = \text{Ber}(1/2)$
- $Y = \text{Ber}(\sigma(2A))$
- $X_2 = \mathcal{N}(Y, 1)$

---

<sup>1</sup> $\sigma(x) = 1/(1 + e^{-x})$

- $X_1 = A + X_2$
- $R^* = X_1$
- $(\tilde{R} = X_2)$

First we show that in both scenarios  $R^*$  is actually an optimal score. In the first scenario  $Y \perp\!\!\!\perp A \mid X_1$  and  $Y \perp\!\!\!\perp X_2 \mid X_1$  thus the optimal predictor is only based on  $X_1$ . We find

$$\Pr(Y = y \mid X_1 = x_1) = \sigma(2x_1y), \quad (1)$$

which is monotonic in  $x_1$ . Hence optimal classification is obtained by thresholding a score based only on  $R^* = X_1$ .

In the second scenario, because  $Y \perp\!\!\!\perp X_1 \mid \{A, X_2\}$  the optimal predictor only depends on  $A, X_2$ . We compute for the densities

$$\mathbb{P}(Y \mid X_2, A) = \frac{\mathbb{P}(Y, X_2, A)}{\mathbb{P}(X_2, A)} \quad (2a)$$

$$= \frac{\mathbb{P}(X_2, A \mid Y)\mathbb{P}(Y)}{\mathbb{P}(X_2, A)} \quad (2b)$$

$$= \frac{\mathbb{P}(X_2 \mid Y)\mathbb{P}(A \mid Y)\mathbb{P}(Y)}{\mathbb{P}(X_2, A)} \quad (2c)$$

$$= \frac{\mathbb{P}(X_2 \mid Y) \frac{\mathbb{P}(Y \mid A)\mathbb{P}(A)}{\mathbb{P}(Y)} \mathbb{P}(Y)}{\mathbb{P}(X_2, A)} \quad (2d)$$

$$= \frac{\mathbb{P}(X_2 \mid Y)\mathbb{P}(Y \mid A)\mathbb{P}(A)}{\mathbb{P}(X_2, A)}, \quad (2e)$$

where for the third equal sign we use  $A \perp\!\!\!\perp X_2 \mid Y$ . In the numerator we have

$$\mathbb{P}(X_2 \mid Y = y)(x_2)\mathbb{P}(Y \mid A = a)(y)\mathbb{P}(A)(a) = f_{\mathcal{N}(y,1)}(x_2)f_{Ber(\sigma(2a))}(y)f_{Ber(1/2)}(a), \quad (3)$$

where  $f_D$  is the probability density function of the distribution  $D$ . The denominator can be computed by summing up (15) for  $y \in \{-1, 1\}$ . Overall this results in

$$\Pr(Y = y \mid X_2 = x_2, A = a) = \sigma(2y(a + x_2)).$$

Since by construction  $X_1 = A + X_2$ , the optimal predictor is again  $R^* = X_1$ . If the joint distribution  $\mathbb{P}(A, Y, R^*)$  is identical in the two scenarios, so are the joint distributions  $\mathbb{P}(A, Y, X_1, X_2, R^*)$ , because of  $X_1 = R^*$  and  $X_2 = X_1 - A$ .

To show that the joint distributions  $\mathbb{P}(A, Y, R^*) = \mathbb{P}(Y \mid A, R^*)\mathbb{P}(R^* \mid A)\mathbb{P}(A)$  are the same, we compare the conditional distributions in the factorization.

Let us start with  $\mathbb{P}(Y \mid A, R^*)$ . Since  $R^* = X_1$  and in the first graph  $Y \perp\!\!\!\perp A \mid X_1$ , we already found the distribution in (13). In the right graph,  $\mathbb{P}(Y \mid R^*, A) = \mathbb{P}(Y \mid X_2 + A, A) = \mathbb{P}(Y \mid X_2, A)$  which we have found in (14) and coincides with the conditional in the left graph because of  $X_1 = A + X_2$ .

Now consider  $R^* \mid A$ . In the left graph we have  $\mathbb{P}(R^* \mid A) = \mathbb{P}(X_1 \mid A)$  and the distribution  $\mathbb{P}(X_1 \mid A)$  is just the mixture of Gaussians defined in the structural equation model. In the right graph  $R^* = A + X_2 = Y + \mathcal{N}(A, 1)$  and thus  $\mathbb{P}(R^* \mid A) = \mathcal{N}(A \pm 1)$  for  $Y = \pm 1$ . Because of the definition of  $Y$  in the structural equations of the right graph, following a Bernoulli distribution with probability  $\sigma(2A)$ , this is the same mixture of Gaussians as the one we found for the left graph.

Clearly the distribution of  $A$  is identical in both cases.

Consequently the joint distributions agree.

When  $X_1$  is an resolving variable, the optimal predictor in the left graph does not exhibit unresolved discrimination, whereas the graph on the right does.

The proof for the equal odds predictor  $\tilde{R}$  is immediate once we show  $\tilde{R} = X_2$ . This can be seen from the graph on the right, because here  $X_2 \perp\!\!\!\perp A \mid Y$  and both using  $A$  or  $X_1$  would violate the equal odds condition. Because the joint distribution in the left graph is the same,  $\tilde{R} = X_2$  is also the optimal equal odds score.  $\square$

### Proof of Proposition 1

**Proposition.** *If there is no directed path from a proxy to a feature, unawareness avoids proxy discrimination.*

*Proof.* An unaware predictor  $R$  is given by  $R = r(X)$  for some function  $r$  and features  $X$ . If there is no directed path from proxies  $P$  to  $X$ , i.e.  $P \notin \text{ta}^{\mathcal{G}}(X)$ , then  $R = r(X) = r(\text{ta}^{\mathcal{G}}(X)) = r(\text{ta}_P^{\mathcal{G}}(X))$ . Thus  $\mathbb{P}(R \mid \text{do}(P = p)) = \mathbb{P}(R)$  for all  $p$ , which avoids proxy discrimination.  $\square$

### Proof of Theorem 2

**Theorem.** *Let the influence of  $P$  on  $X$  be additive and linear, i.e.*

$$X = f_X(P, \text{ta}_P^{\mathcal{G}}(X)) = g_X(\text{ta}_P^{\mathcal{G}}(X)) + \mu_X P$$

*for some function  $g_X$  and  $\mu_X \in \mathbb{R}$ . Then any predictor of the form*

$$R = r(X - \mathbb{E}[X \mid \text{do}(P)])$$

*for some function  $r$  exhibits no proxy discrimination.*

*Proof.* It suffices to show that the argument of  $r$  is constant w.r.t. to  $P$ , because then  $R$  and thus  $\mathbb{P}(R)$  are invariant under changes of  $P$ . We compute

$$\begin{aligned} \mathbb{E}[X \mid \text{do}(P)] &= \mathbb{E}[g_X(\text{ta}_P^{\mathcal{G}}(X)) + \mu_X P \mid \text{do}(P)] \\ &= \underbrace{\mathbb{E}[g_X(\text{ta}_P^{\mathcal{G}}(X)) \mid \text{do}(P)]}_{=0} + \mathbb{E}[\mu_X P \mid \text{do}(P)] \\ &= \mu_X P. \end{aligned}$$

Hence,

$$X - \mathbb{E}[X \mid \text{do}(P)] = g_X(\text{ta}_P^{\mathcal{G}}(X))$$

is clearly constant w.r.t. to  $P$ .  $\square$

### Proof of Corollary 1

**Corollary.** *Under the assumptions of Theorem 2, if all directed paths from any ancestor of  $P$  to  $X$  in the graph  $\mathcal{G}$  are blocked by  $P$ , then any predictor based on the adjusted features  $\tilde{X} := X - \mathbb{E}[X \mid P]$  exhibits no proxy discrimination and can be learned from the observational distribution  $\mathbb{P}(P, X, Y)$  when target labels  $Y$  are available.*

*Proof.* Let  $Z$  denote the set of ancestors of  $P$ . Under the given assumptions  $Z \cap \text{ta}^{\mathcal{G}}(X) = \emptyset$ , because in  $\tilde{\mathcal{G}}$  all arrows into  $P$  are removed, which breaks all directed paths from any variable in  $Z$  to  $X$  by assumption. Hence the distribution of  $X$  under an intervention on  $P$  in  $\tilde{\mathcal{G}}$ , where the influence of potential ancestors of  $P$  on  $X$  that does not go through  $P$  would not be affected, is the same as simply conditioning on  $P$ . Therefore  $\mathbb{E}[X \mid \text{do}(P)] = \mathbb{E}[X \mid P]$ , which can be computed from the joint observational distribution, since we observe  $X$  and  $P$  as generated by  $\tilde{\mathcal{G}}$ .  $\square$

### Proof of Proposition 3

**Proposition.** *Any predictor of the form  $R = \lambda(X - \mathbb{E}[X \mid \text{do}(P)]) + c$  for linear  $\lambda, c \in \mathbb{R}$  exhibits no proxy discrimination in expectation.*

*Proof.* We directly test the definition of proxy discrimination in expectation using the linearity of the expectation

$$\begin{aligned} \mathbb{E}[R \mid \text{do}(P = p)] &= \mathbb{E}[\lambda(X - \mathbb{E}[X \mid \text{do}(P)]) + c \mid \text{do}(P = p)] \\ &= \lambda(\mathbb{E}[X \mid \text{do}(P = p)] - \mathbb{E}[X \mid \text{do}(P = p)]) + c \\ &= c. \end{aligned}$$

This holds for any  $p$ , hence proxy discrimination in expectation is achieved.  $\square$

### Additional statements

Here we provide an additional statement that is a first step towards the “opposite direction” of Theorem 2, i.e. whether we can infer information about the structural equations, when we are given a predictor of a special form that does not exhibit proxy discrimination.

**Theorem.** *Let the influence of  $P$  on  $X$  be additive and linear and let the influence of  $P$  on the argument of  $R$  be additive linear, i.e.*

$$\begin{aligned} f_X(\text{ta}_P^G(X)) &= g_X(\text{ta}_P^G(X)) + \mu_X P \\ f_R(P, \text{ta}_P^G(X)) &= h(g_R(\text{ta}_P^G(X)) + \mu_R P) \end{aligned}$$

for some functions  $g_X, g_R$ , real numbers  $\mu_X, \mu_R$  and a smooth, strictly monotonic function  $h$ . Then any predictor that avoids proxy discrimination is of the form

$$R = r(X - \mathbb{E}[X \mid \text{do}(P)])$$

for some function  $r$ .

*Proof.* From the linearity assumptions we conclude that

$$\hat{f}_R(P, X) = h(g_X(\text{ta}_P^G(X)) + \mu_X P + \hat{\mu}_R P),$$

with  $\hat{\mu}_R = \mu_R - \mu_P$  and thus  $g_X = g_R$ . That means that both the dependence of  $X$  on  $P$  along the path  $P \rightarrow \dots \rightarrow X$  as well as the direct dependence of  $R$  on  $P$  along  $P \rightarrow R$  are additive and linear.

To avoid proxy discrimination, we need

$$\mathbb{P}(R \mid \text{do}(P = p)) = \mathbb{P}(h(g_R(\text{ta}_P^G(X)) + \mu_R p)) \quad (4a)$$

$$\stackrel{!}{=} \mathbb{P}(h(g_R(\text{ta}_P^G(X)) + \mu_R p')) = \mathbb{P}(R \mid \text{do}(P = p')). \quad (4b)$$

Because  $h$  is smooth and strictly monotonic, we can conclude that already the distributions of the argument of  $h$  must be equal, otherwise the transformation of random variables could not result in equal distributions, i.e.

$$\mathbb{P}(g_R(\text{ta}_P^G(X)) + \mu_R p) \stackrel{!}{=} \mathbb{P}(g_R(\text{ta}_P^G(X)) + \mu_R p').$$

Since, up to an additive constant, we are comparing the distributions of the *same* random variable  $g_R(\text{ta}_P^G(X))$  and not merely identically distributed ones, the following condition is not only sufficient, but also necessary for (16)

$$g_R(\text{ta}_P^G(X)) + \mu_R p \stackrel{!}{=} g_R(\text{ta}_P^G(X)) + \mu_R p'.$$

This holds true for all  $p, p'$  only if  $\mu_R = 0$ , which is equivalent to  $\hat{\mu}_R = -\mu_P$ .

Because as in the proof of 2

$$\mathbb{E}[X \mid \text{do}(P)] = \mu_X P,$$

under the given assumptions any predictor that avoids proxy discrimination is simply

$$R = X + \mu_R P = X - \mathbb{E}[X \mid \text{do}(P)].$$

□
